# Supplementary material
Source: PubMed Central journal article supplement (PMC3736586)
Supplement: NIHMS499834-supplement-01.pdf [file NIHMS499834-supplement-01.pdf]

**Supplementary table 1. Sequence variants identified by DNA sequencing in ADIPOQ coding sequence**

| <b>SNP</b> | <b>amino acid coding change</b> | <b>Position</b> | <b>MAF</b> | <b>location</b> | <b>p-value for association</b> |
|------------|---------------------------------|-----------------|------------|-----------------|--------------------------------|
| C-186T     | -                               | 188043005       | 0.013      | promoter        | <b>0.20</b>                    |
| rs2241766  | G15G                            | 188053586       | 0.14       | exon 2          | 0.32                           |
| G133C      | G45R                            | 188053674       | 0.039      | exon 2          | <0.0001                        |
| C75T       | P25P                            | 188053616       | 0.0087     | exon 2          | 0.79                           |
| rs17366743 | Y111H                           | 188054783       | 0.022      | exon 3          | 0.84                           |

\*position in build NCBI36/hb18
